# Supplementary material for: Unraveling the Molecular Mechanisms Underlying Complement Dysregulation by Nephritic Factors in C3G and IC-MPGN
Source: PubMed Central journal article supplement (PMC6248175; doi:10.3389/fimmu.2018.02329), 2018-10-15
Supplement: Data_Sheet_1.pdf [file Data_Sheet_1.pdf]

*Supplementary material*

**Manuscript #383223 Revised version**

**UNRAVELLING THE MOLECULAR MECHANISMS UNDERLYING COMPLEMENT  
DYSREGULATION BY NEPHRITIC FACTORS IN C3G AND IC-MPGN**

Roberta Donadelli, Patrizia Pulieri, Rossella Piras, Paraskevas Iatropoulos, Elisabetta Valoti,  
Ariela Benigni, Giuseppe Remuzzi, Marina Noris

## Supplementary figures and tables

### Supplementary figure 1

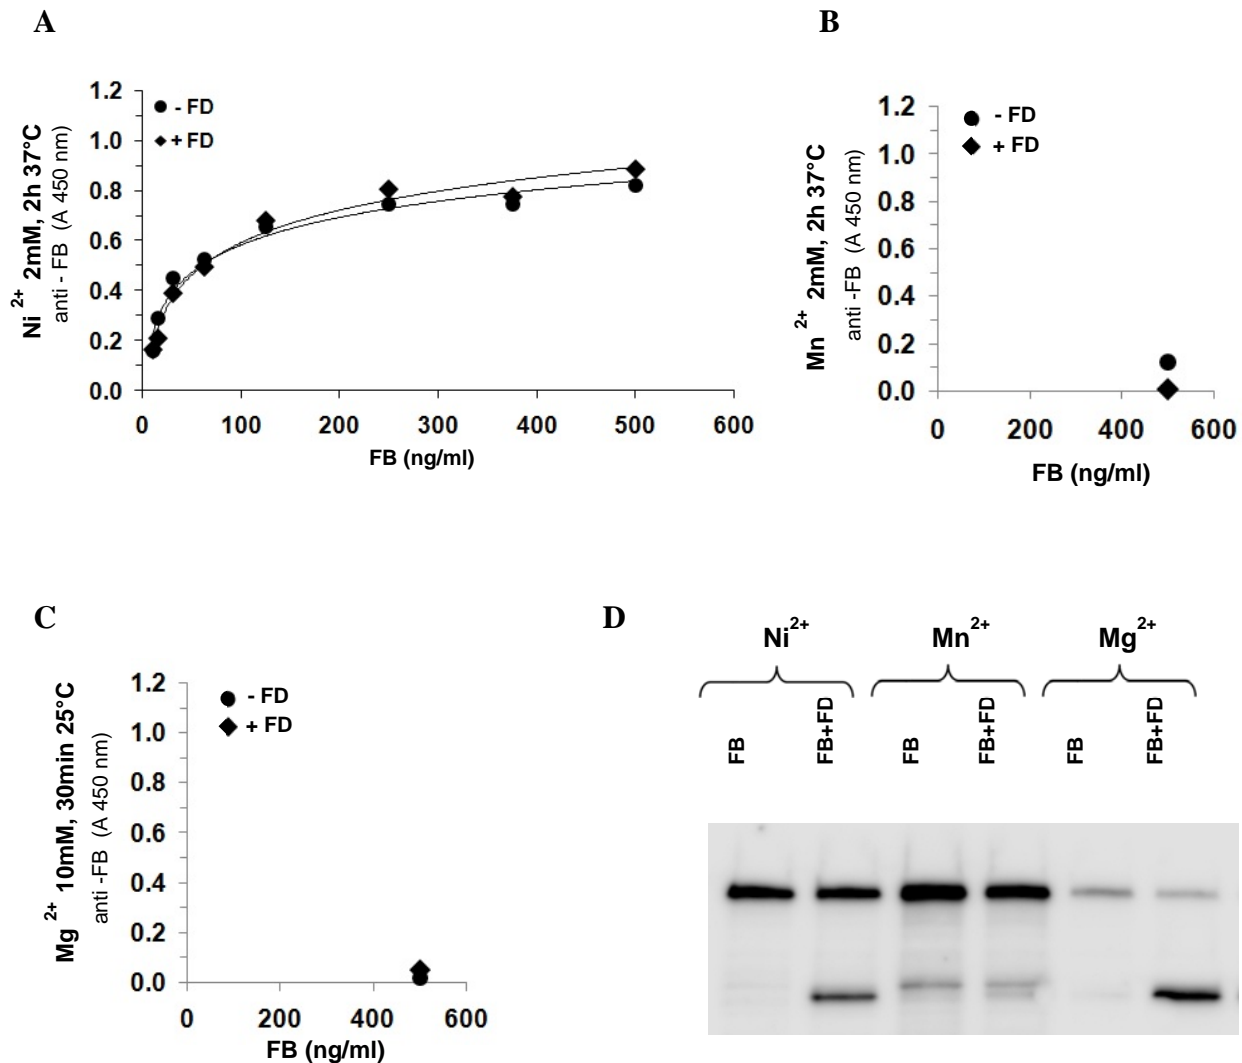

**Supplementary Figure 1. Detection of formation of C3bB C3 proconvertase and C3bBb C3 convertase complexes by ELISA and microplate/Western blot (WB) assays.** (A), Detection of  $\text{Ni}^{2+}$ -dependent C3bB and C3bBb. C3b-coated microtiter wells were incubated with increasing amounts of FB (0-500 ng/ml) and 2 mM  $\text{NiCl}_2$  in the absence or in the presence of 25 ng/ml FD and analysed by ELISA by using an anti-FB antibody. (B-C) C3b coated wells were incubated with 500 ng/ml FB in the presence or in the absence of 25 ng/ml FD, 2 mM  $\text{MnCl}_2$  or 10 mM  $\text{MgCl}_2$  to obtain C3bB( $\text{Mn}^{2+}$ ) and C3bBb( $\text{Mg}^{2+}$ ), respectively. Complexes formed were detected by ELISA with an anti-FB antibody. (D) C3bB and C3bBb complexes were formed with  $\text{NiCl}_2$ ,  $\text{MnCl}_2$  or  $\text{MgCl}_2$ , then detached from the wells and analysed by WB with an anti-FB antibody. C3bB and C3bBb formation was evaluated by the visualization of the B band (93 KDa) and the Bb band (60 KDa), respectively. One representative experiment of three is shown.

Supplementary Figure 2.

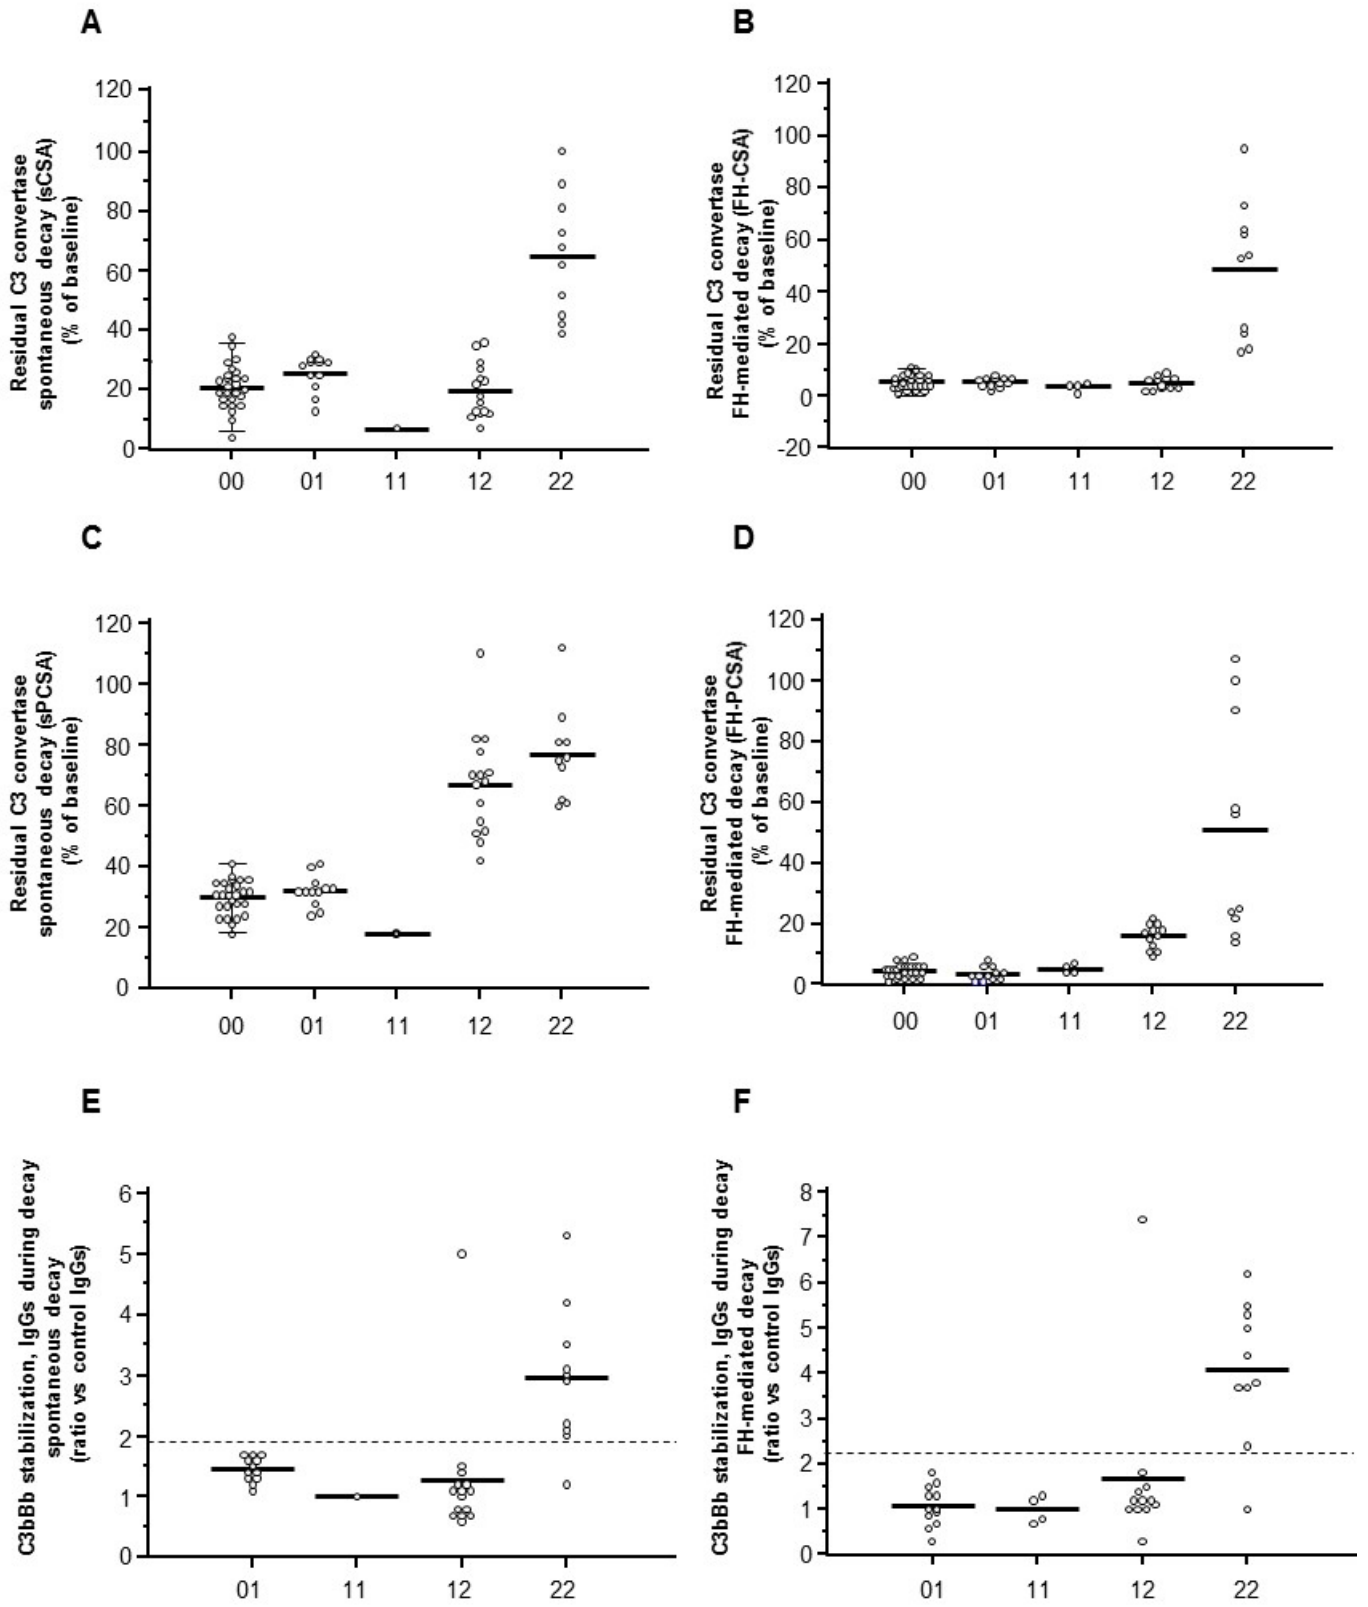

**Supplementary Figure 2. Individual values of residual C3 convertase after decay in healthy subjects, in control C3G/IC-MPGN patients negative for C3NeF by hemolytic assay (C3G/IC-MPGN controls) and in C3G/IC-MPGN patients with C3NeF by hemolytic assay (C3G/IC-MPGN cases)**

**(A-B) Protocol 1.** C3bBb(Mg<sup>2+</sup>) complexes were formed by incubating at 25° C for 12 min C3b-coated wells with 1000 ng/ml FB, 10 ng/ml FD, 100 µg/ml IgGs purified from healthy donors, or C3G/IC-MPGN cases or C3G/IC-MPGN controls and 10 mM MgCl<sub>2</sub>. Spontaneous (**A, sCSA**) or FH-mediated (**B, FH-CSA**) decay of the complexes was monitored by further incubation of C3bBb(Mg<sup>2+</sup>) formed in the absence of FH for 32 min at 25° C with buffer alone or 2640 ng/ml FH respectively.

The percentage of residual Bb band (visualized by an anti-FB antibody) was calculated as the ratio of the densities (in Pixel<sup>2</sup>) of each Bb band after decay and the corresponding baseline Bb band density before decay x 100.

**(C-D) Protocol 3.** C3bBb(Mg<sup>2+</sup>) complexes were formed by incubating at 25° C for 12 min C3b-coated wells with 1000 ng/ml FB, 10 ng/ml FD, 100 µg/ml IgGs from from healthy donors, or C3G/IC-MPGN cases or C3G/IC-MPGN controls and 10 mM MgCl<sub>2</sub> in the presence of 500 ng/ml Properdin (P) (baseline). In additional wells after washing, spontaneous or FH-mediated decay of the formed complexes were monitored by further incubation for 32 min at 25° C with buffer alone (**sPCSA, C**) or buffer added with 2640 ng/ml FH (**FH-PCSA, D**), respectively.

**(E-F) Protocol 2.** C3bBb(Mg<sup>2+</sup>) complexes were formed by incubating at 25° C for 12 min C3b-coated wells with 1000 ng/ml FB, 10 ng/ml FD, and 10 mM MgCl<sub>2</sub>. The complexes formed were then incubated in the presence of 100 µg/ml IgGs from healthy donors, or C3G/IC-MPGN cases or C3G/IC-MPGN controls without (spontaneous decay, **E**) or with (FH-mediated decay, **F**) 2640 ng/ml FH. The C3NeF IgG C3 convertase-stabilizing activity was quantified as the ratio of the densities (in pixel<sup>2</sup>) of Bb bands (visualized by an anti-FB antibody) after decay in the presence of patient IgGs/ Bb band after decay in the presence of control IgGs (ratio patient Bb band/control Bb band).

The percentage of residual Bb band was calculated as the ratio of the densities (in Pixel<sup>2</sup>) of each Bb band (visualized by an anti-FB antibody) after decay and the corresponding baseline Bb band density before decay x 100.

**00:** healthy subjects, n=26

**01:** control C3G/IC-MPGN patients negative for C3NeF by hemolytic assay, n=12.

**11:** C3G/IC-MPGN cases without C3 convertase stabilizing activity (spontaneous decay n=1 panels A, C and E; FH-decay n=4, panels B, D and F).

**12:** C3G/IC-MPGN cases with properdin dependent C3 convertase stabilizing activity (spontaneous decay n=15 panels A,C and E; FH-decay n=12, panels B, D and F).

**22:** C3G/IC-MPGN cases with properdin independent C3 convertase stabilizing activity (spontaneous decay n=10 panels A, C and E; FH-decay n=10, panels B, D and F).

The horizontal bars through the plots are the means. Vertical lines in **00** groups in panels A-D indicate ±2SD. The dashed horizontal lines in panels E and F show the limit of positive values (ratios between the mean + 2SD and the mean of residual Bb band in the reactions with IgGs from 26 healthy subjects).

**Supplementary Table 1.** Clinical features, complement assessment, genetic screening and histologic features in patients classified according to the type of C3 convertase stabilizing activity (FH-mediated decay).

| Variable                                       | FH-CSA-/<br>FH-PCSA- | FH-CSA-/<br>FH-PCSA+ | FH-CSA+/<br>FH-PCSA+ | Overall<br>p-value | - / + vs.<br>+ / +<br>p-value |
|------------------------------------------------|----------------------|----------------------|----------------------|--------------------|-------------------------------|
| <b>N</b>                                       | 4                    | 12                   | 10                   |                    |                               |
| <b>Gender (% males)</b>                        | 0%                   | 58%                  | 70%                  | 0.056              | 0.675                         |
| <b>Data at onset</b>                           |                      |                      |                      |                    |                               |
| Age (y) - Mean (SD)                            | 13.1 (±8.2)          | 13.7 (±6.9)          | 11.1 (±3)            | 0.597              | 0.288                         |
| Microhematuria                                 | 75%                  | 91%                  | 90%                  | 0.55               | 1.00                          |
| Gross hematuria                                | 25%                  | 17%                  | 60%                  | 0.127              | 0.074                         |
| Proteinuria                                    | 75%                  | 100%                 | 90%                  | 0.142              | 0.455                         |
| Nephrotic syndrome                             | 50%                  | 42%                  | 40%                  | 1.00               | 1.00                          |
| Renal impairment                               | 0%                   | 8%                   | 0%                   | 1.00               | 1.00                          |
| Familiarity for nephropathy                    | 0%                   | 17%                  | 0%                   | 0.631              | 0.481                         |
| Serum C3 (mg/dl)                               | 24.5 (±24.8)         | 25.4 (±14.8)         | 21.6 (±16.5)         | 0.870              | 0.575                         |
| Serum C4 (mg/dl)                               | 15 (±9.2)            | 17.3 (±8.9)          | 24.4 (±8)            | 0.100              | 0.067                         |
| Plasma sC5b-9 (ng/ml)                          | 1654 (±1276)         | 1718 (±1309)         | 616 (±612)           | 0.065              | <b>0.024</b>                  |
| Low serum C3 and normal serum C4               | 50%                  | 75%                  | 100%                 | 0.074              | 0.221                         |
| C3NeF positive                                 | 100%                 | 100%                 | 90%                  | 0.540              | 0.46                          |
| LPV carriers                                   | 50%                  | 17%                  | 20%                  | 0.393              | 1.00                          |
| <b>Data during follow-up</b>                   |                      |                      |                      |                    |                               |
| Nephrotic syndrome                             | 75%                  | 83%                  | 40%                  | 0.127              | <b>0.074</b>                  |
| High blood pressure                            | 0%                   | 50%                  | 67%                  | 0.130              | 0.66                          |
| Chronic kidney disease                         | 0%                   | 33%                  | 30%                  | 0.704              | 1.00                          |
| ESRD                                           | 0%                   | 8%                   | 10%                  | 1.00               | 1.00                          |
| <b>Histological features</b>                   |                      |                      |                      |                    |                               |
| Time Onset to Biopsy (yr)                      | 1.6 (±2.3)           | 1.6 (±2.4)           | 0.7 (±1.2)           | 0.511              | 0.260                         |
| <b>Light microscopy</b>                        |                      |                      |                      |                    |                               |
| Sclerotic glomeruli                            | 2% (±4%)             | 1% (±2%)             | 0% (±1%)             | 0.450              | 0.698                         |
| Crescents                                      | 6% (±11%)            | 1% (±2%)             | 15% (±30%)           | 0.256              | 0.125                         |
| Degree of mesangial proliferation*             | 1.5 (±1.3)           | 1.2 (±1.2)           | 1.7 (±0.9)           | 0.585              | 0.302                         |
| Degree of endocapillary proliferation*         | 0.2 (±0.5)           | 1.2 (±0.9)           | 1 (±1.1)             | 0.253              | 0.688                         |
| Degree of interstitial inflammation*           | 1.2 (±1)             | 0.6 (±0.7)           | 0.4 (±0.5)           | 0.160              | 0.495                         |
| Degree of interstitial fibrosis*               | 0.5 (±0.6)           | 0.4 (±0.7)           | 0.1 (±0.3)           | 0.440              | 0.320                         |
| Degree of arteriolar sclerosis*                | 0 (±0)               | 0.1 (±0.3)           | 0.1 (±0.3)           | 0.815              | 0.888                         |
| <b>Immunofluorescence</b>                      |                      |                      |                      |                    |                               |
| C3*                                            | 2.6 (±0.5)           | 2.8 (±0.3)           | 2.8 (±0.4)           | 0.614              | 0.923                         |
| IgA*                                           | 1.0 (±0.8)           | 0.3 (±0.6)           | 0.1 (±0.2)           | <b>0.025</b>       | 0.223                         |
| IgG*                                           | 1.2 (±1.5)           | 1.8 (±1.3)           | 0.6 (±0.7)           | 0.090              | <b>0.023</b>                  |
| IgM*                                           | 1.6 (±0.8)           | 1.1 (±0.9)           | 0.8 (±0.8)           | 0.271              | 0.431                         |
| C1q*                                           | 0.5 (±0.6)           | 1.2 (±1.1)           | 0.6 (±0.8)           | 0.198              | 0.130                         |
| Fibrinogen*                                    | 0.9 (±1.4)           | 0.4 (±0.7)           | 0.1 (±0.3)           | 0.260              | 0.320                         |
| <b>Electron microscopy</b>                     |                      |                      |                      |                    |                               |
| Mesangial deposits                             | 50%                  | 55%                  | 40%                  | 0.866              | 0.670                         |
| Subepithelial deposits                         | 50%                  | 36%                  | 30%                  | 0.864              | 1.00                          |
| Subepithelial hump-like deposits               | 0%                   | 22%                  | 20%                  | 1.00               | 1.00                          |
| Subendothelial deposits                        | 75%                  | 91%                  | 30%                  | <b>0.010</b>       | <b>0.008</b>                  |
| Intramembranous granular deposits              | 25%                  | 73%                  | 20%                  | <b>0.033</b>       | <b>0.030</b>                  |
| Intramembranous highly electron-dense deposits | 50%                  | 9%                   | 70%                  | <b>0.012</b>       | <b>0.008</b>                  |

\*Degree of mesangial proliferation, endocapillary proliferation, interstitial inflammation, interstitial fibrosis, and arteriolar sclerosis, as well as IF findings were graded using a scale of 0 to 3, including 0, trace (0.5+), 1+, 2+ and 3+. Quantitative variables are expressed as mean (±S.D.) unless otherwise specified. Serum C3: reference 90-180 mg/dl; serum C4: reference 10-40 mg/dl; plasma

sC5b-9: reference  $\leq 400$  ng/ml. LPV: Likely pathogenetic variants. FH-CSA-/FH-PCSA-: patients without C3 convertase stabilizing activity; FH-CSA-/FH-PCSA+: patients with properdin-dependent C3 convertase stabilizing activity; FH-CSA+/FH-PCSA+: patients with properdin-independent C3 convertase stabilizing activity. Bold numbers indicate statistically significant values.
